# Supplementary material for: Proteasome subunit PSMC3 variants cause neurosensory syndrome combining deafness and cataract due to proteotoxic stress
Source: PubMed Central journal article supplement (PMC7338805; doi:10.15252/emmm.201911861), 2020-06-05

**Figure 3A**

Suc-LLVA-AMC activity:

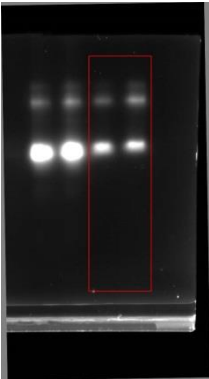

**Figure 3C**

Alpha6 western blot:

PSMC3 western blot:

PA28- $\alpha$  western blot:

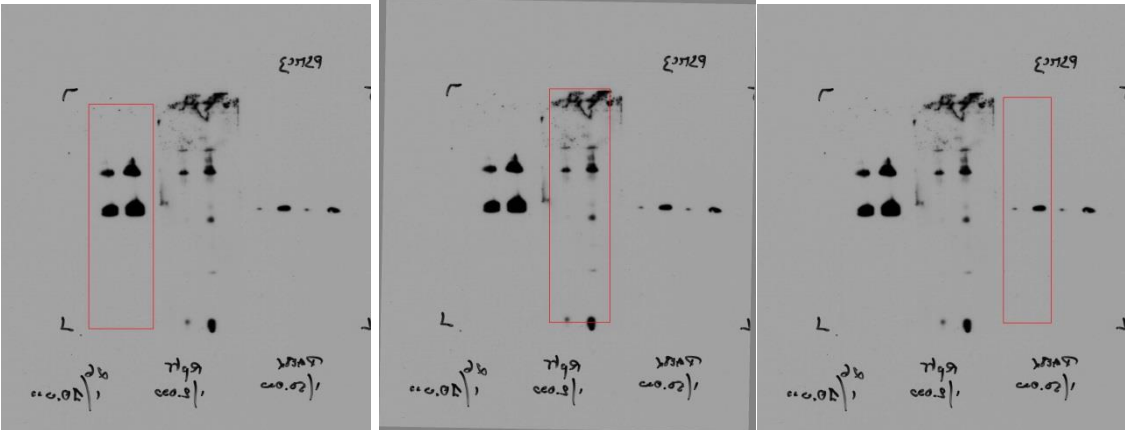

**Figure 3D**

Ubiquitin western blot:

Alpha6 western blot:

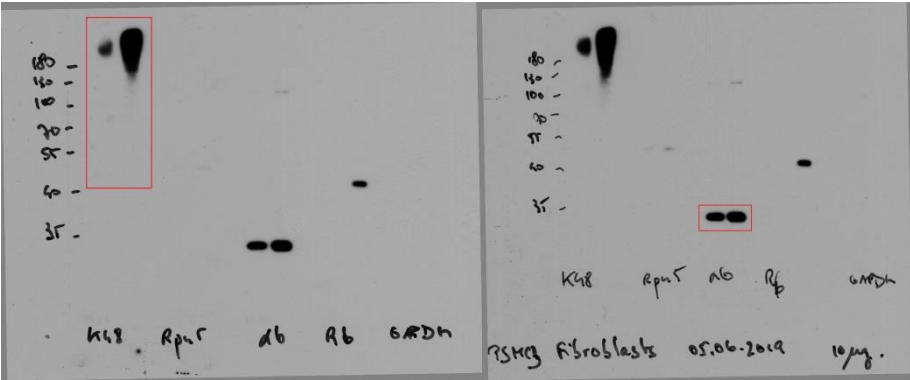

Beta1 western blot:

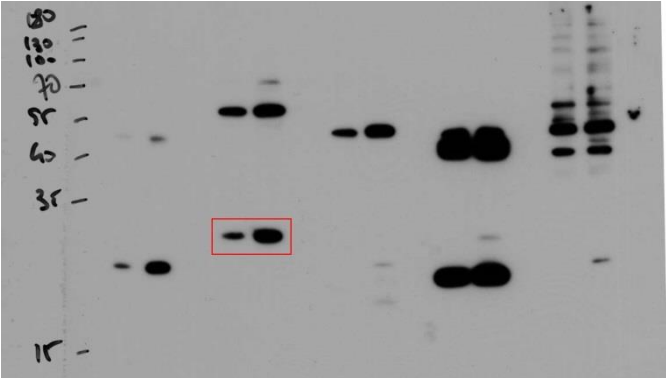

Beta2 western blot:

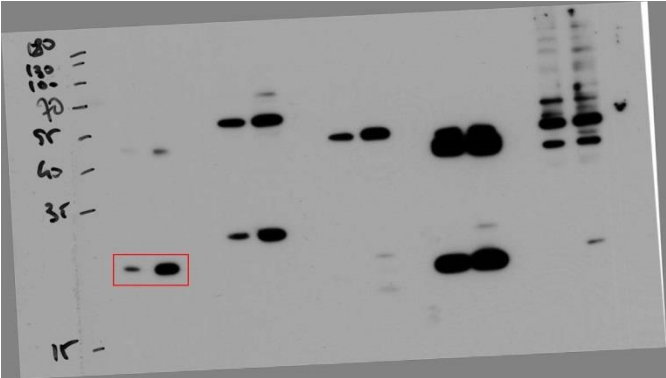

Beta5 western blot:

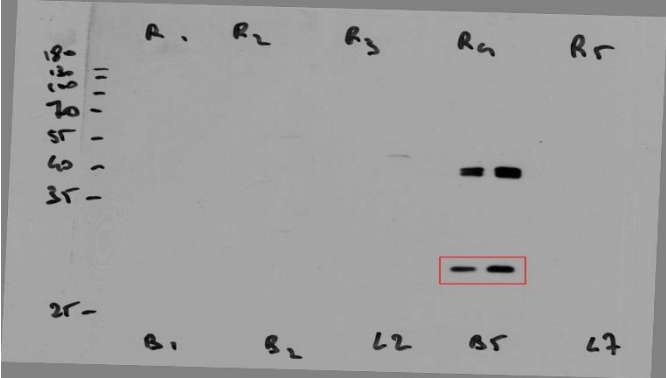

Beta5i western blot:

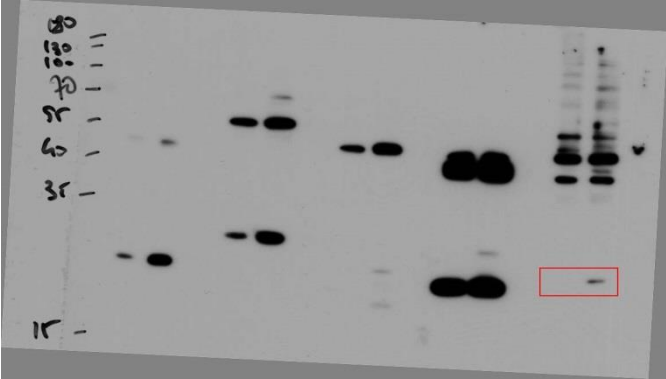

PSMC1 western blot:

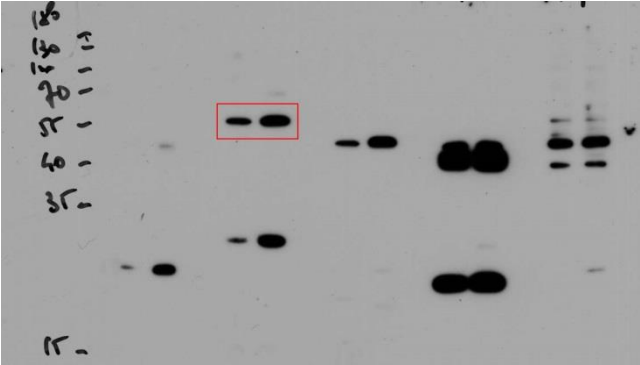

PSMC3 western blot (short exposure)

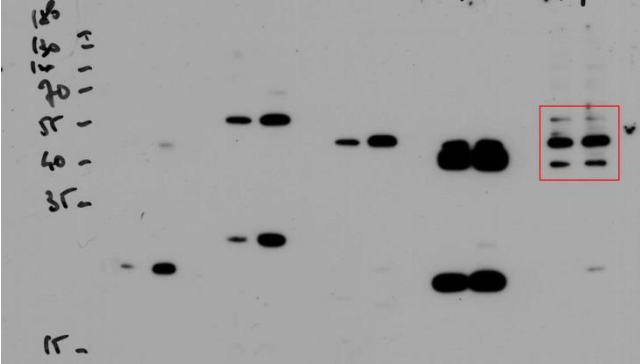

PSMC3 western blot (long exposure)

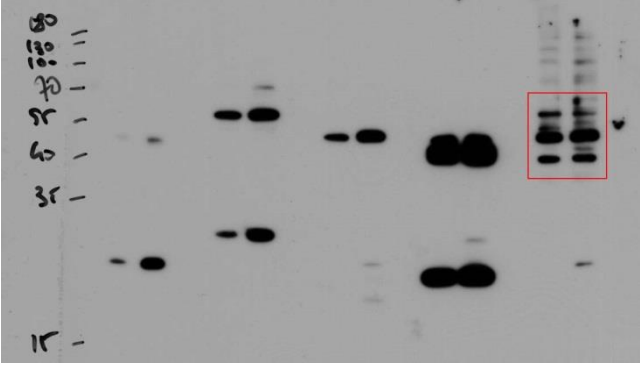

PSMC4 western blot:

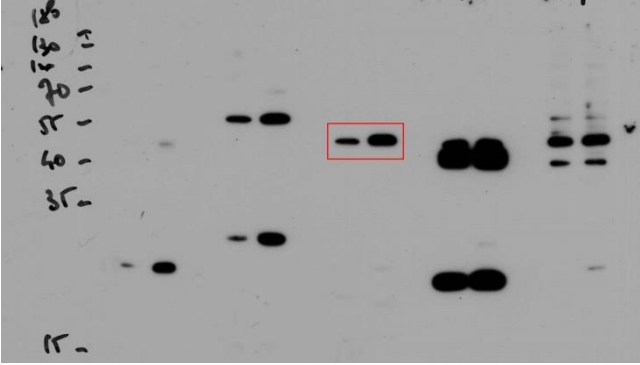

PSMC6 western blot:

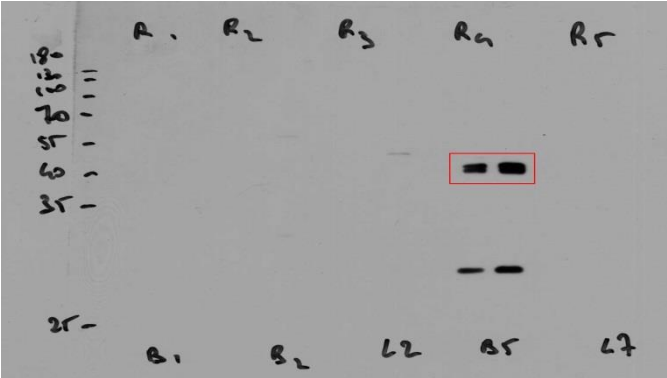

PA28-α western blot:

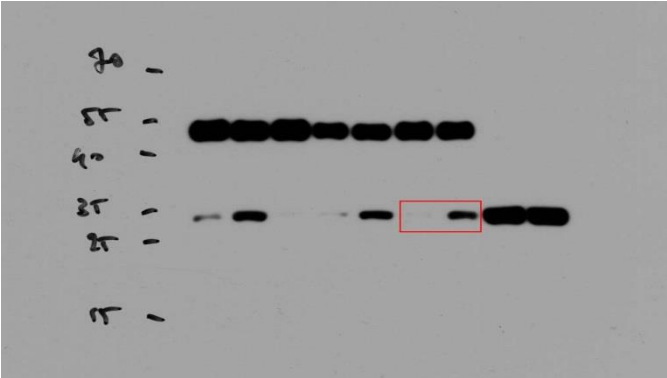

Tubulin western-blot:

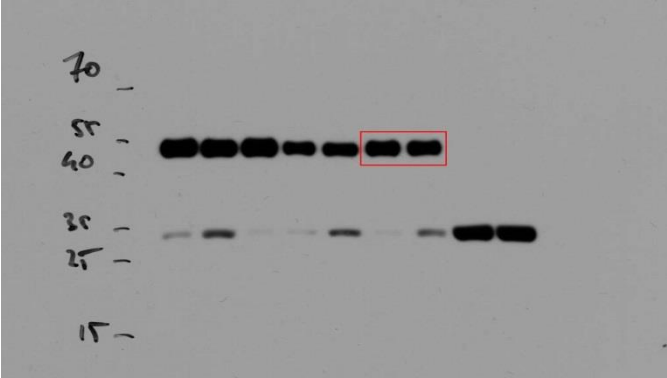

Supplement: EMMM-12-e11861-s004.pdf [file EMMM-12-e11861-s004.pdf]
