# Supplementary material for: Proteasome subunit PSMC3 variants cause neurosensory syndrome combining deafness and cataract due to proteotoxic stress
Source: PubMed Central journal article supplement (PMC7338805; doi:10.15252/emmm.201911861), 2020-06-05

**Figure 5A**

Ubiquitin western Blot:

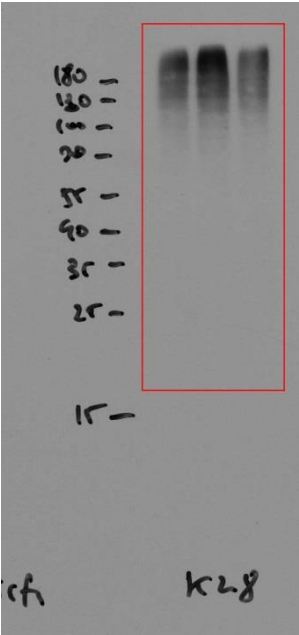

PSMC3 western blot:

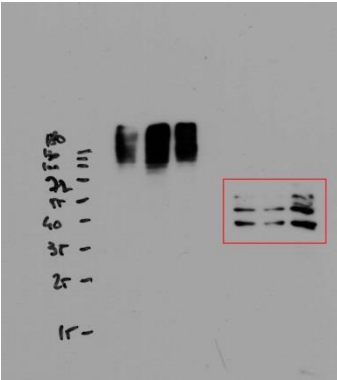

$\alpha$ -Tubulin western blot:

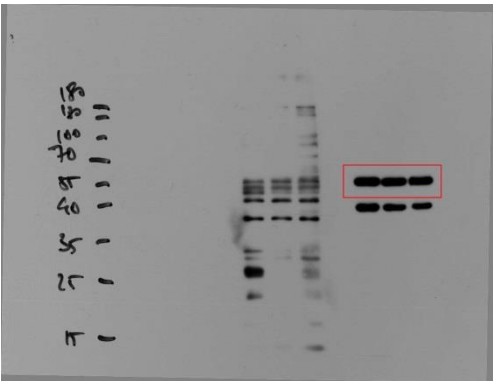

**Figure 5C**

Ubiquitin western blot:

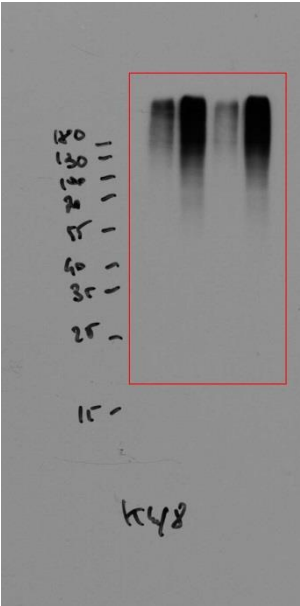

TCF11/Nrf1 western blot (short exposure):

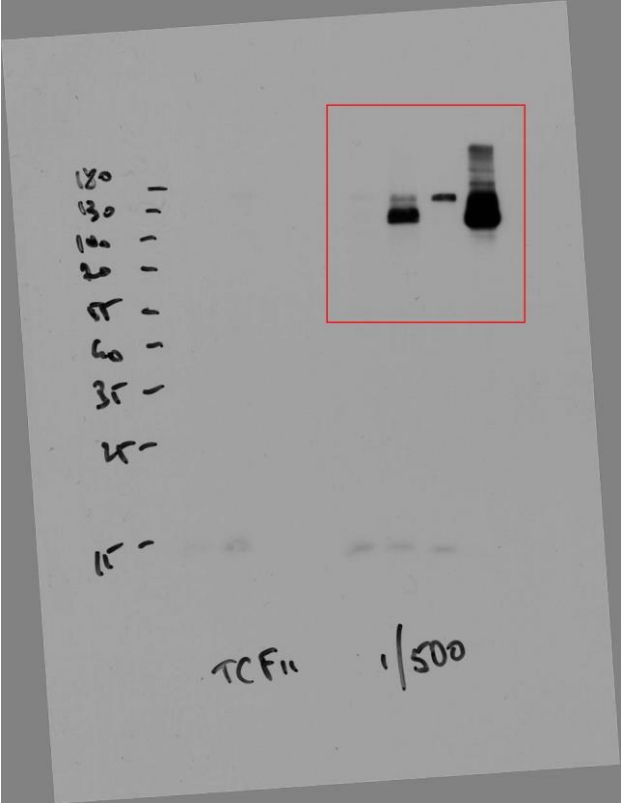

TCF11/Nrf1 western blot (long exposure)

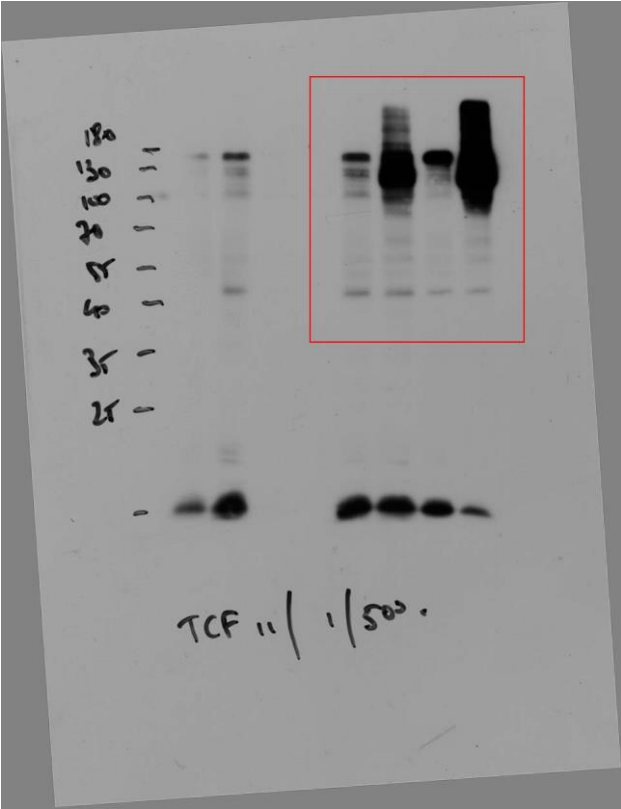

PSMC2 western blot:

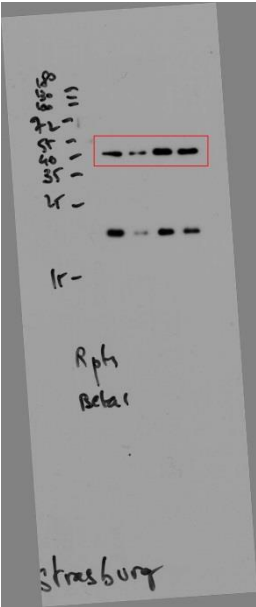

PSMC5 western blot:

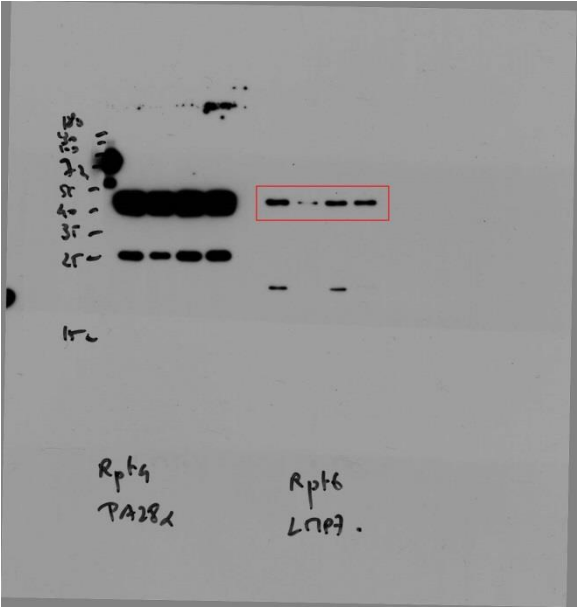

PSMC4 western blot:

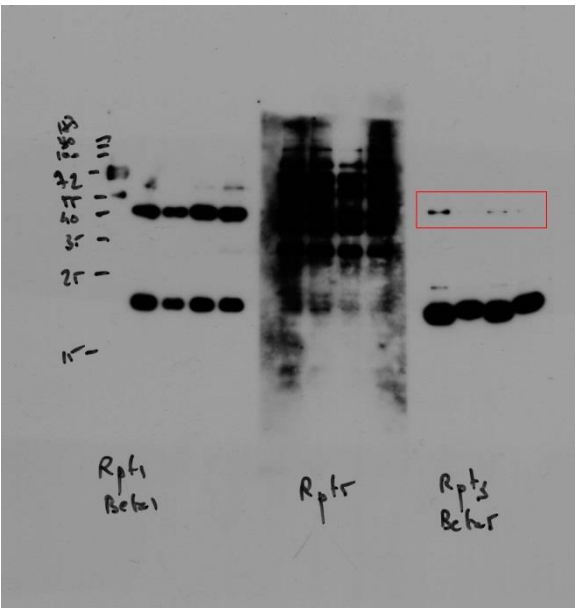

Beta1 western blot:

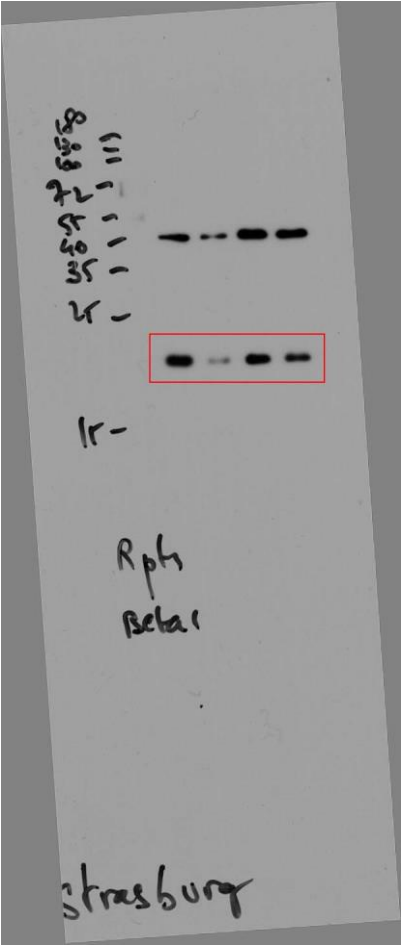

Beta2 western blot:

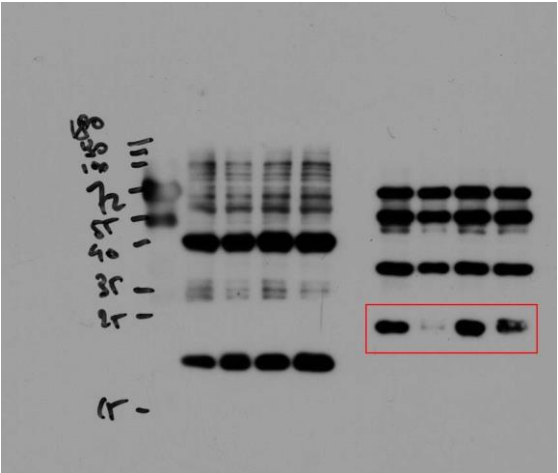

Beta5 western blot:

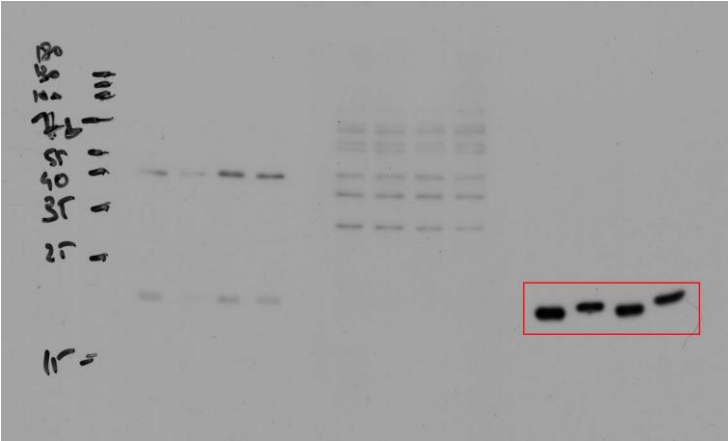

Beta5i western blot:

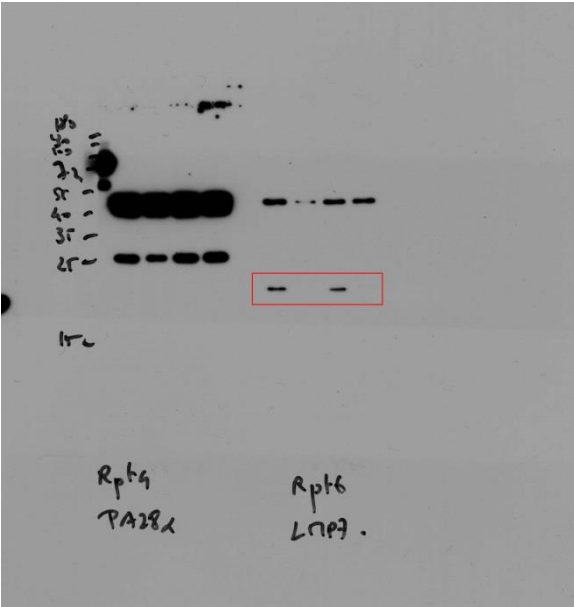

PA28-α western blot:

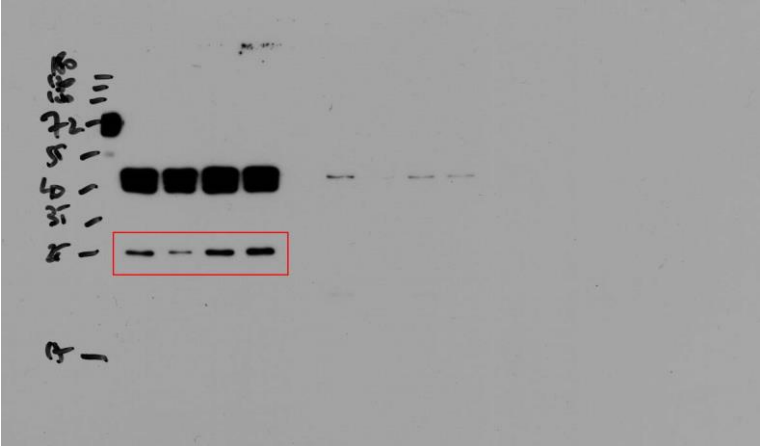

A-tubulin western blot:

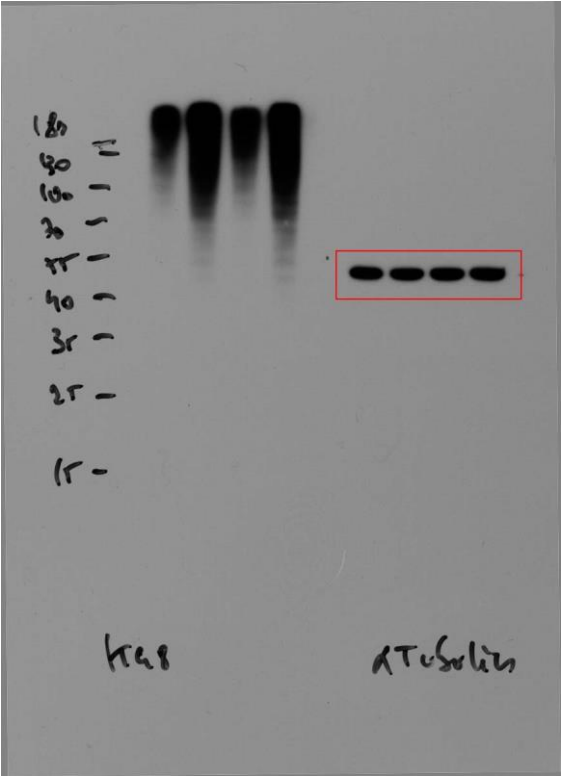

Supplement: EMMM-12-e11861-s006.pdf [file EMMM-12-e11861-s006.pdf]
