# Supplementary material for: Proteasome subunit PSMC3 variants cause neurosensory syndrome combining deafness and cataract due to proteotoxic stress
Source: PubMed Central journal article supplement (PMC7338805; doi:10.15252/emmm.201911861), 2020-06-05

Figure 1E

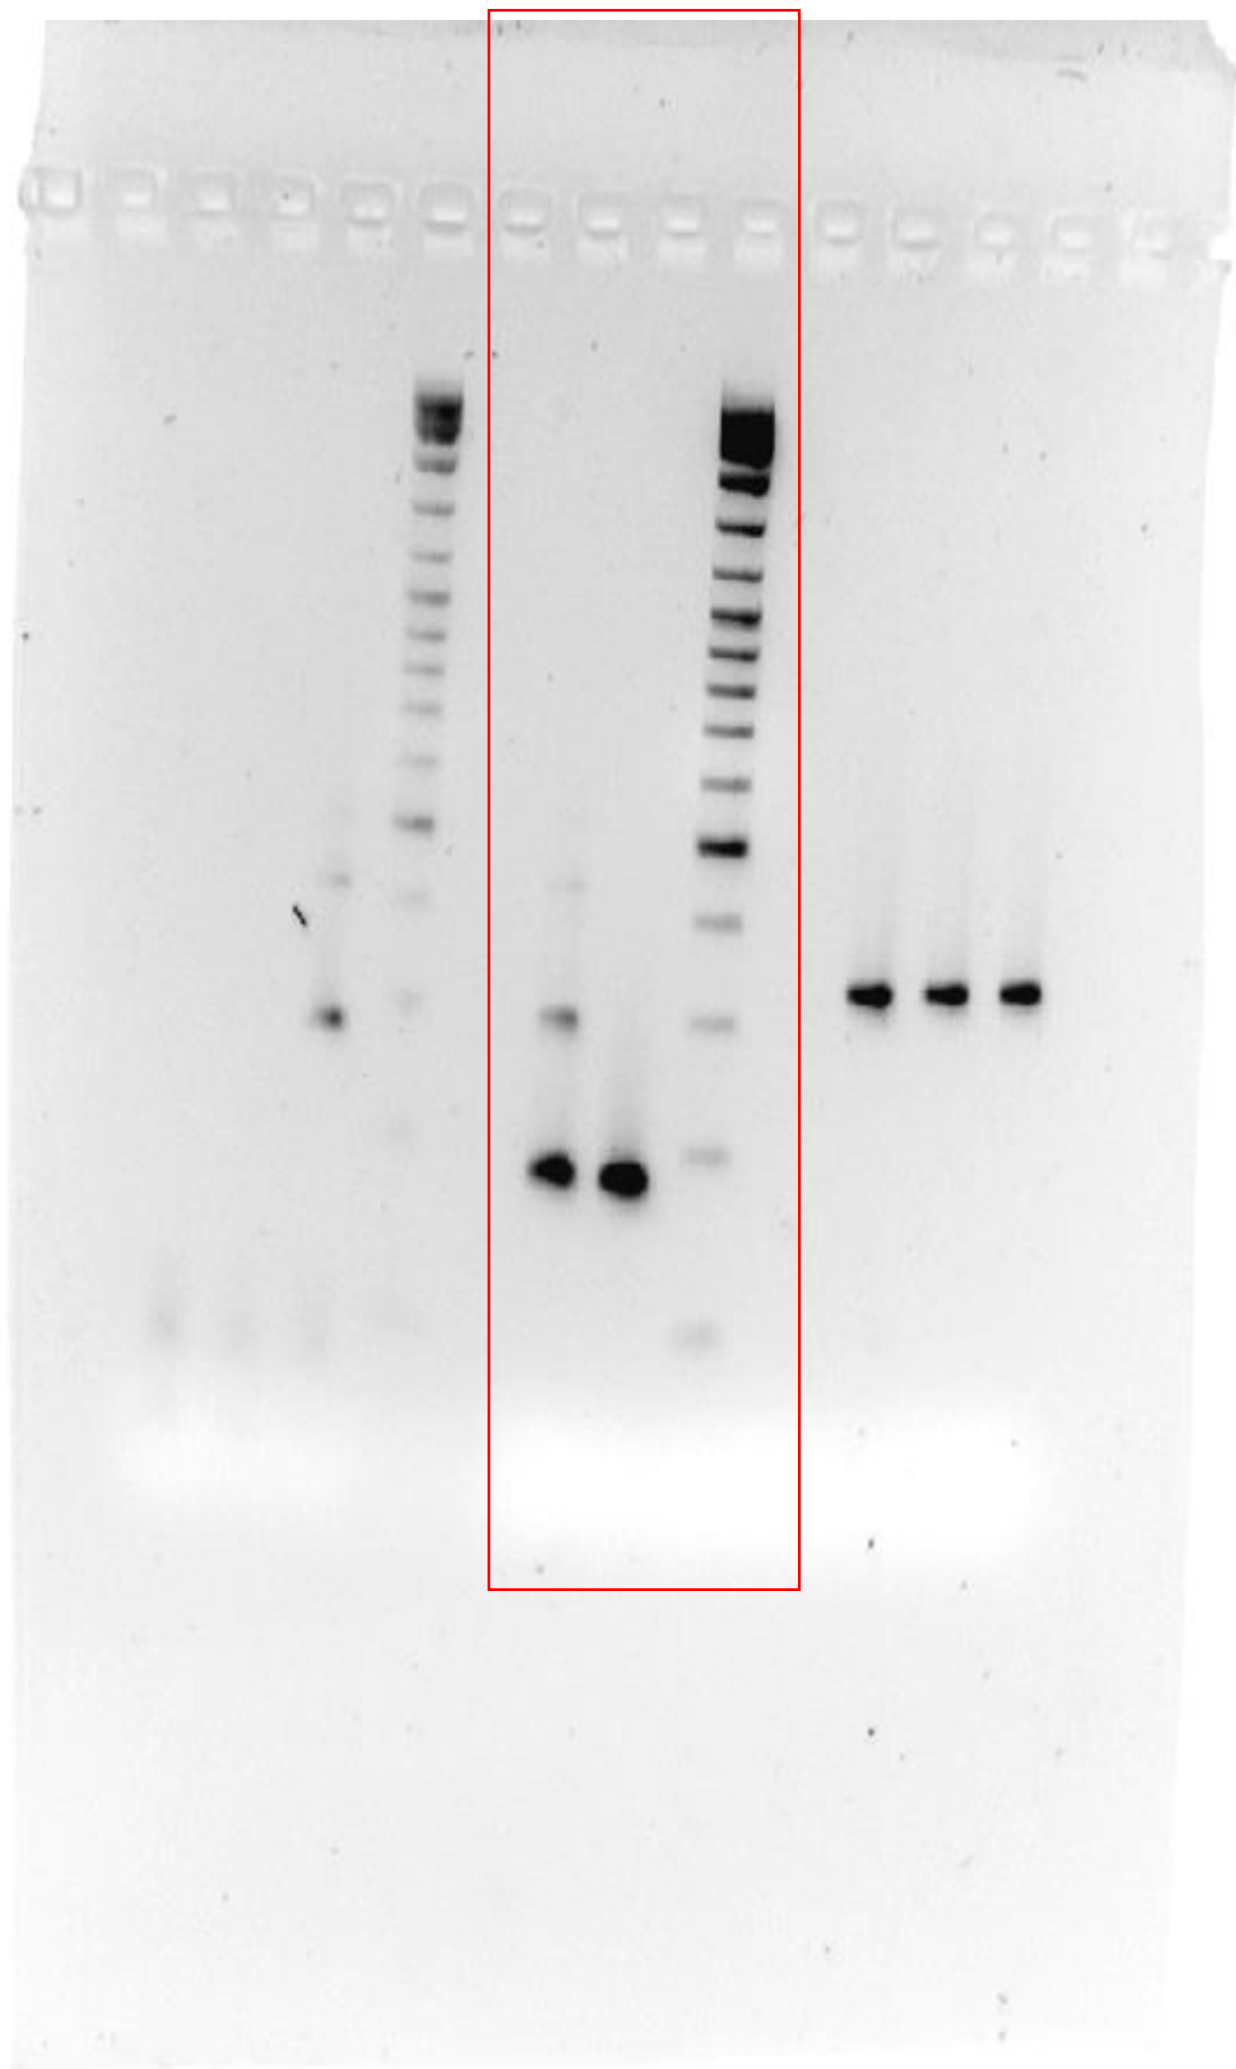

Supplement: EMMM-12-e11861-s003.pdf [file EMMM-12-e11861-s003.pdf]
